# Supplementary material
Source: PubMed Central journal article supplement (PMC3058351)
Supplement: NIHMS237678-supplement-1.pdf [file NIHMS237678-supplement-1.pdf]

# Supplementary Information for

## *Transcription of functionally related constitutive genes is not coordinated*

*Saamil J. Gandhi, Daniel Zenklusen, Timothee Lionnet, and Robert H. Singer\**

Department of Anatomy and Structural Biology, Albert Einstein College of Medicine

1300 Morris Park Avenue, Bronx, New York, 10461, USA

Correspondence: Robert H. Singer

[robert.singer@einstein.yu.edu](mailto:robert.singer@einstein.yu.edu)

**SUPPLEMENTARY DATA**

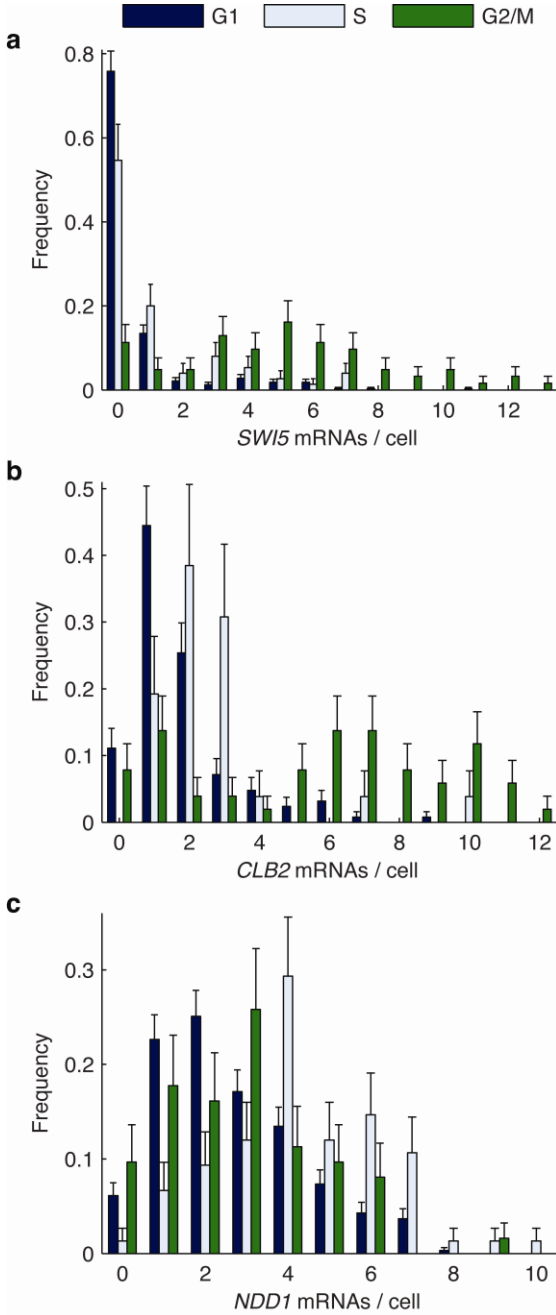

**Supplementary Figure 1, related to Figure 3: Expression profiles of cell-cycle-stage-regulated genes. (a-c) *SWI5*, *CLB2*, and *NDD1* mRNA distributions for cells in G1 (red), S (blue), and G2 / M (green) phase. Error bars indicate s.e.m.**

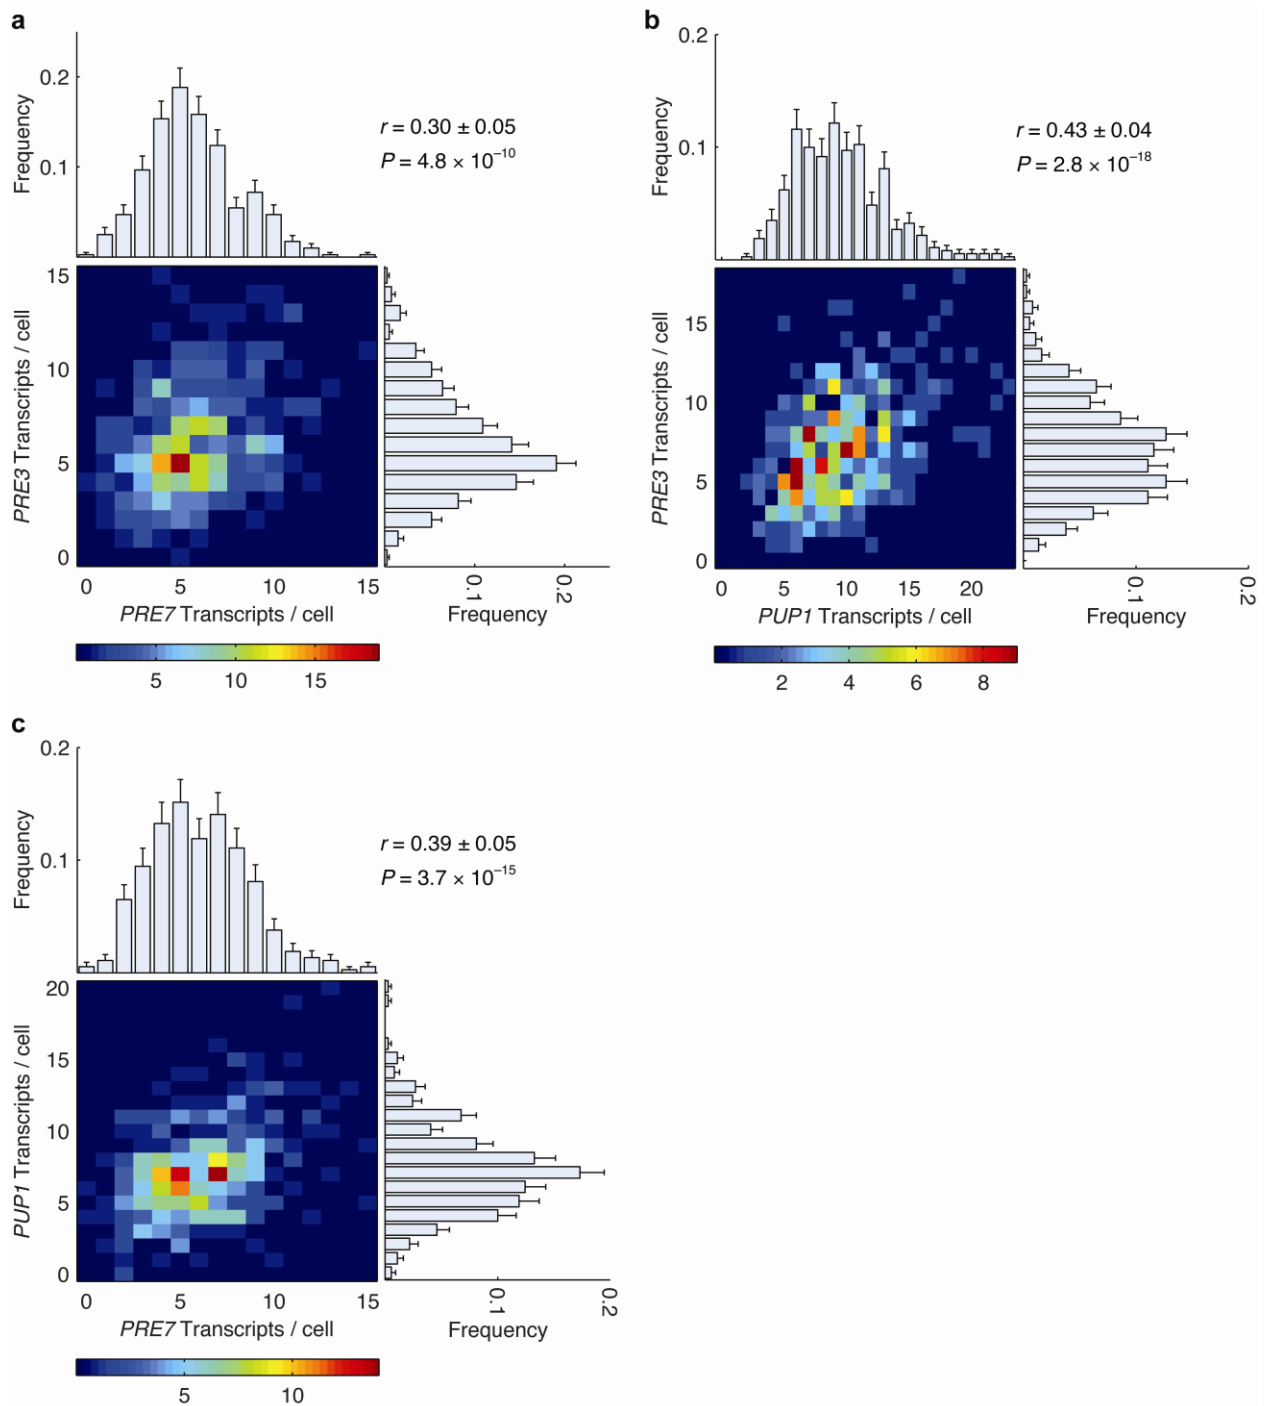

**Supplementary Figure 2, related to Figure 5a: Pair-wise correlation coefficients for mRNAs of genes encoding  $\beta$ -subunits of the proteasome 20S core particle. Error bars indicate s.e.m.**

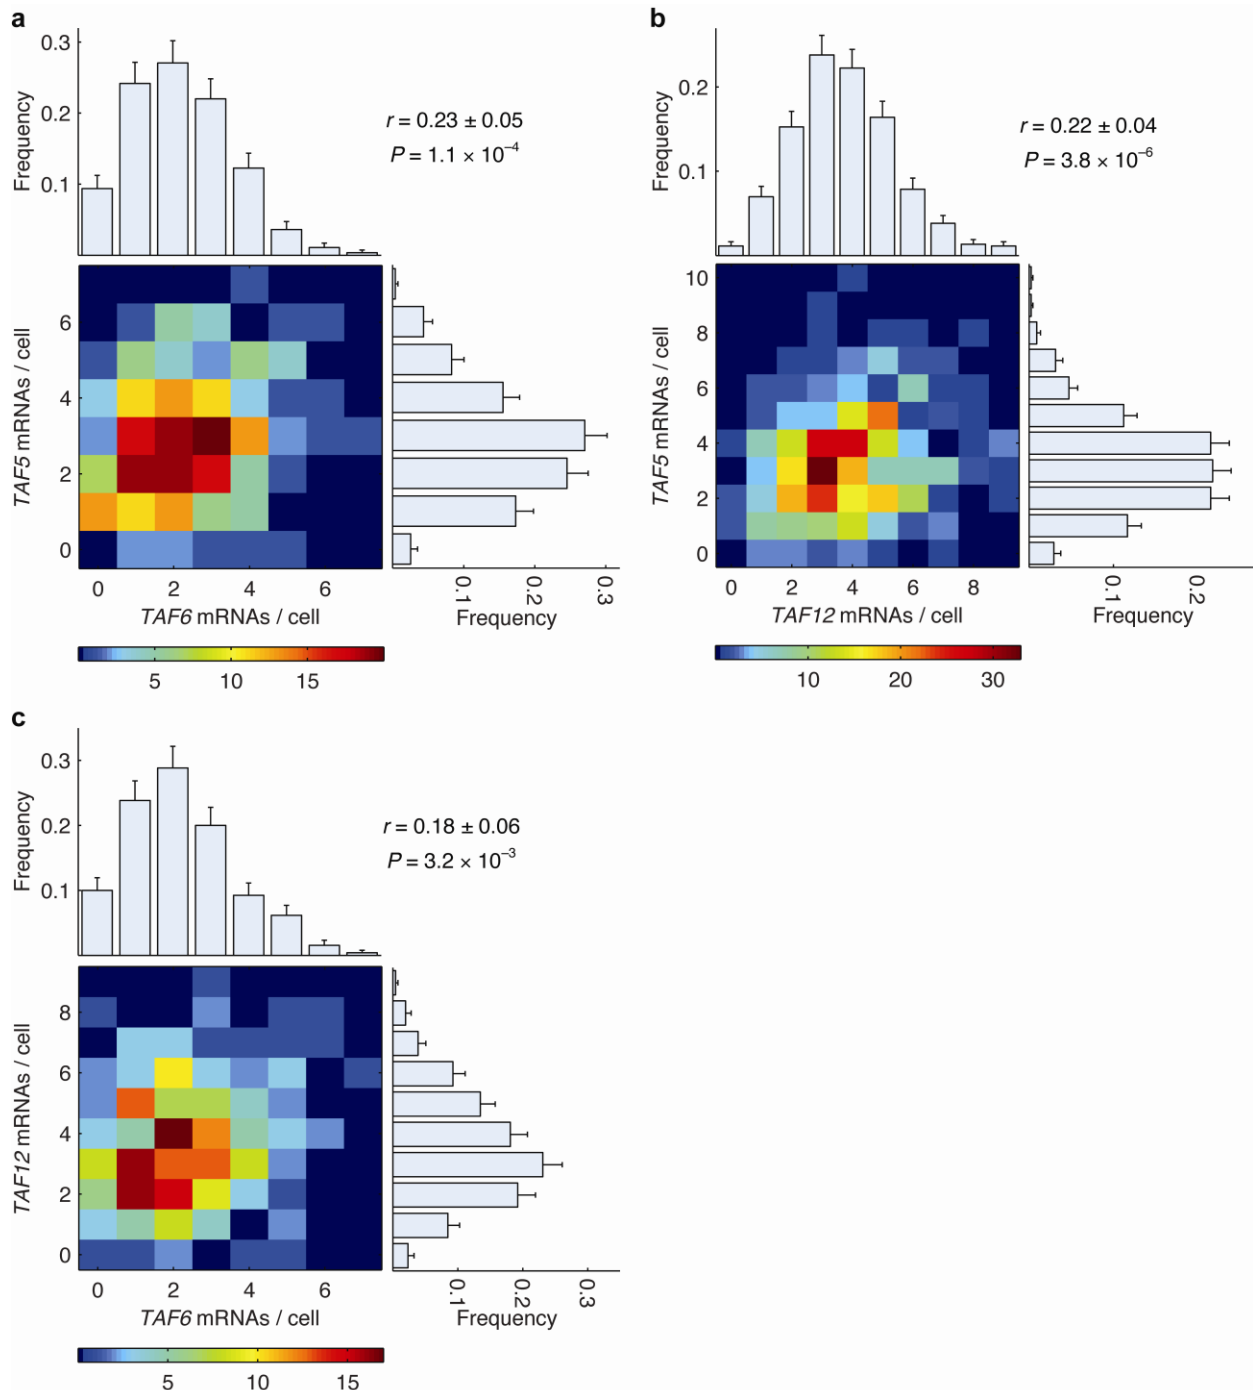

**Supplementary Figure 3, related to Figure 5b: Pair-wise correlation coefficients for mRNAs of genes encoding TATA binding protein associated factors involved in transcription initiation. Error bars indicate s.e.m.**

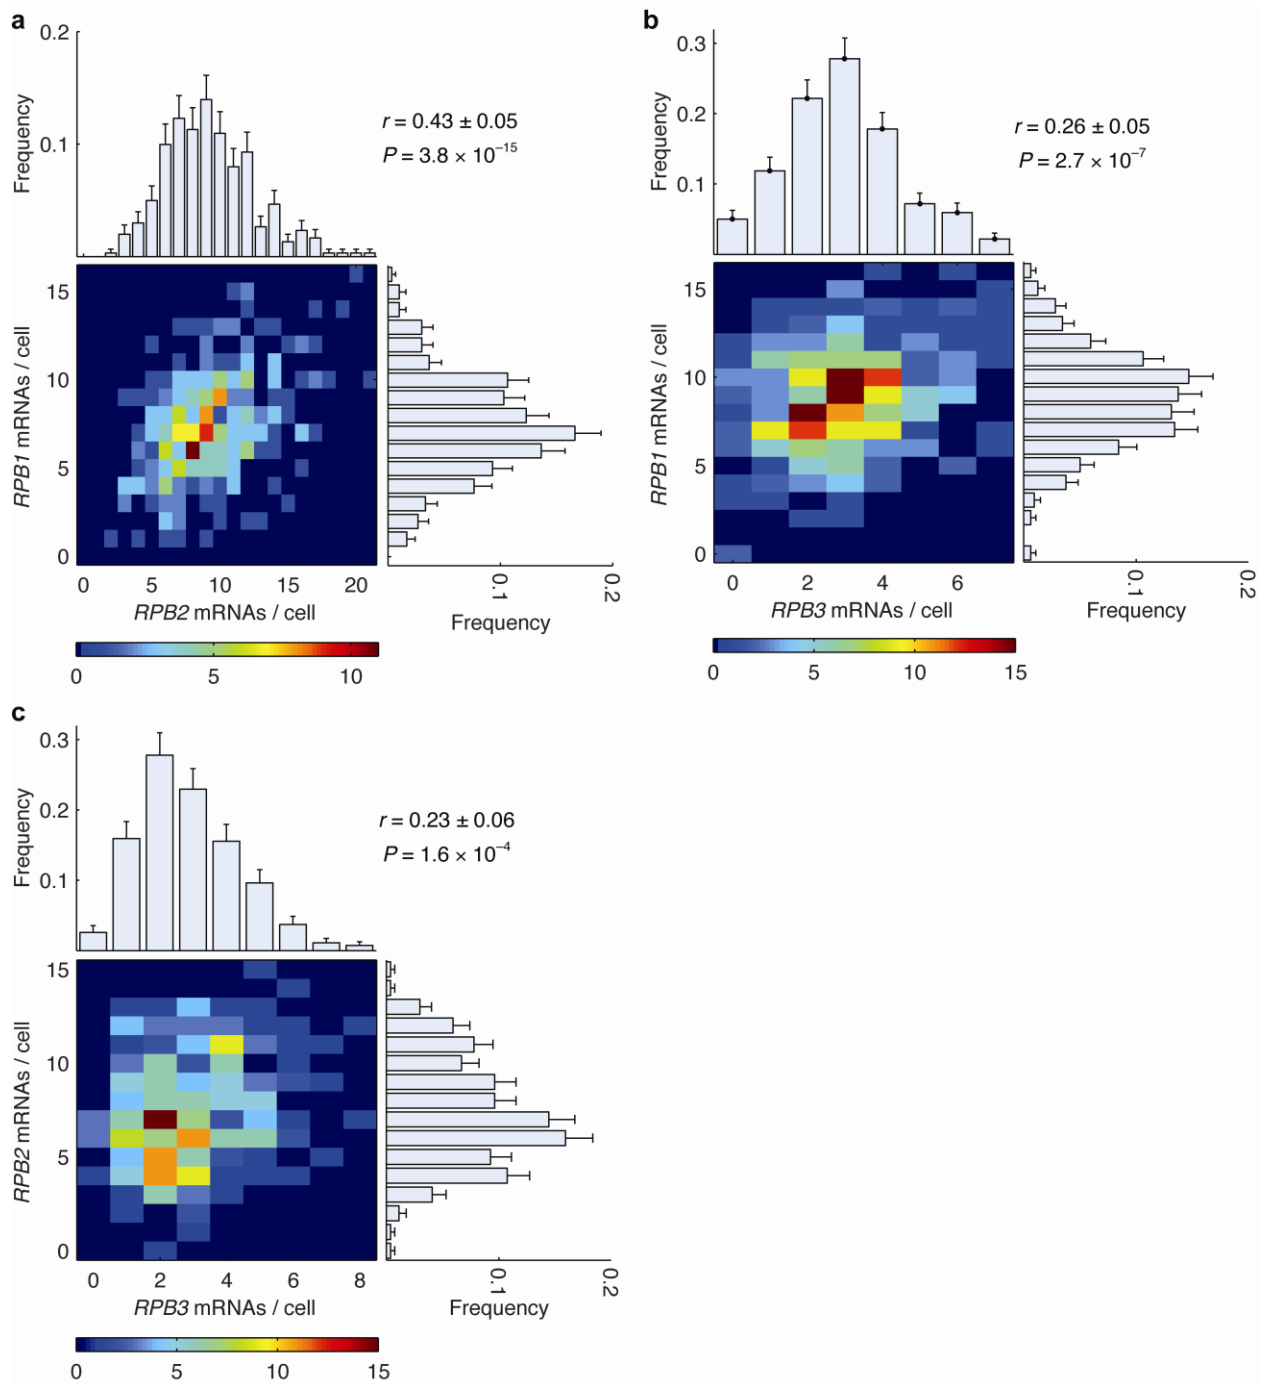

**Supplementary Figure 4, related to Figure 5c: Pair-wise correlation coefficients for mRNAs of genes encoding subunits of RNA polymerase II. Error bars indicate s.e.m.**

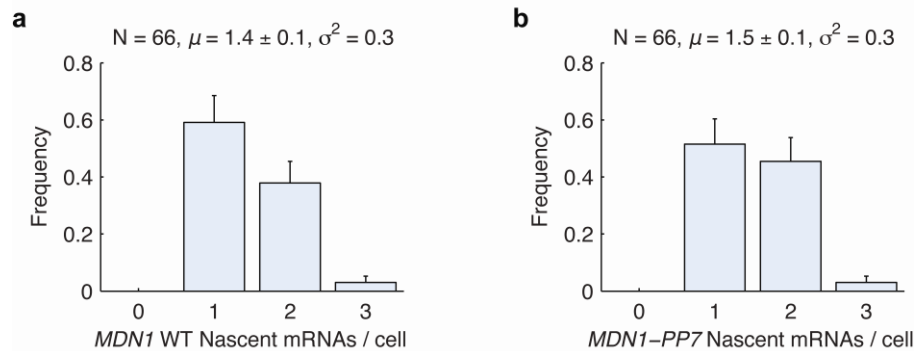

**Supplementary Figure 5, related to Figure 6: Distribution of nascent mRNAs per cell at the *MDN1* transcription sites in the nucleus.** (a) The distribution of nascent mRNAs per cell at the wildtype (WT) *MDN1* allele. The number of nascent mRNAs were calculated by dividing the intensity of FISH signal at the transcription site in the nucleus by the intensity of individual mRNAs in the cytoplasm. ( $\mu$ ) and ( $\sigma^2$ ) represent the mean and variance, respectively, for a population of N cells. (b) The distribution of nascent mRNAs at the *MDN1* allele with 24 PP7 hairpins inserted at the 3' end. The mean number of nascent mRNAs at the wildtype and PP7 alleles were equal, which demonstrates that both alleles are transcribed identically. Moreover, the nascent mRNAs of the two alleles were only weakly correlated ( $r = 0.25 \pm 0.11$ ). Error bars indicate s.e.m.

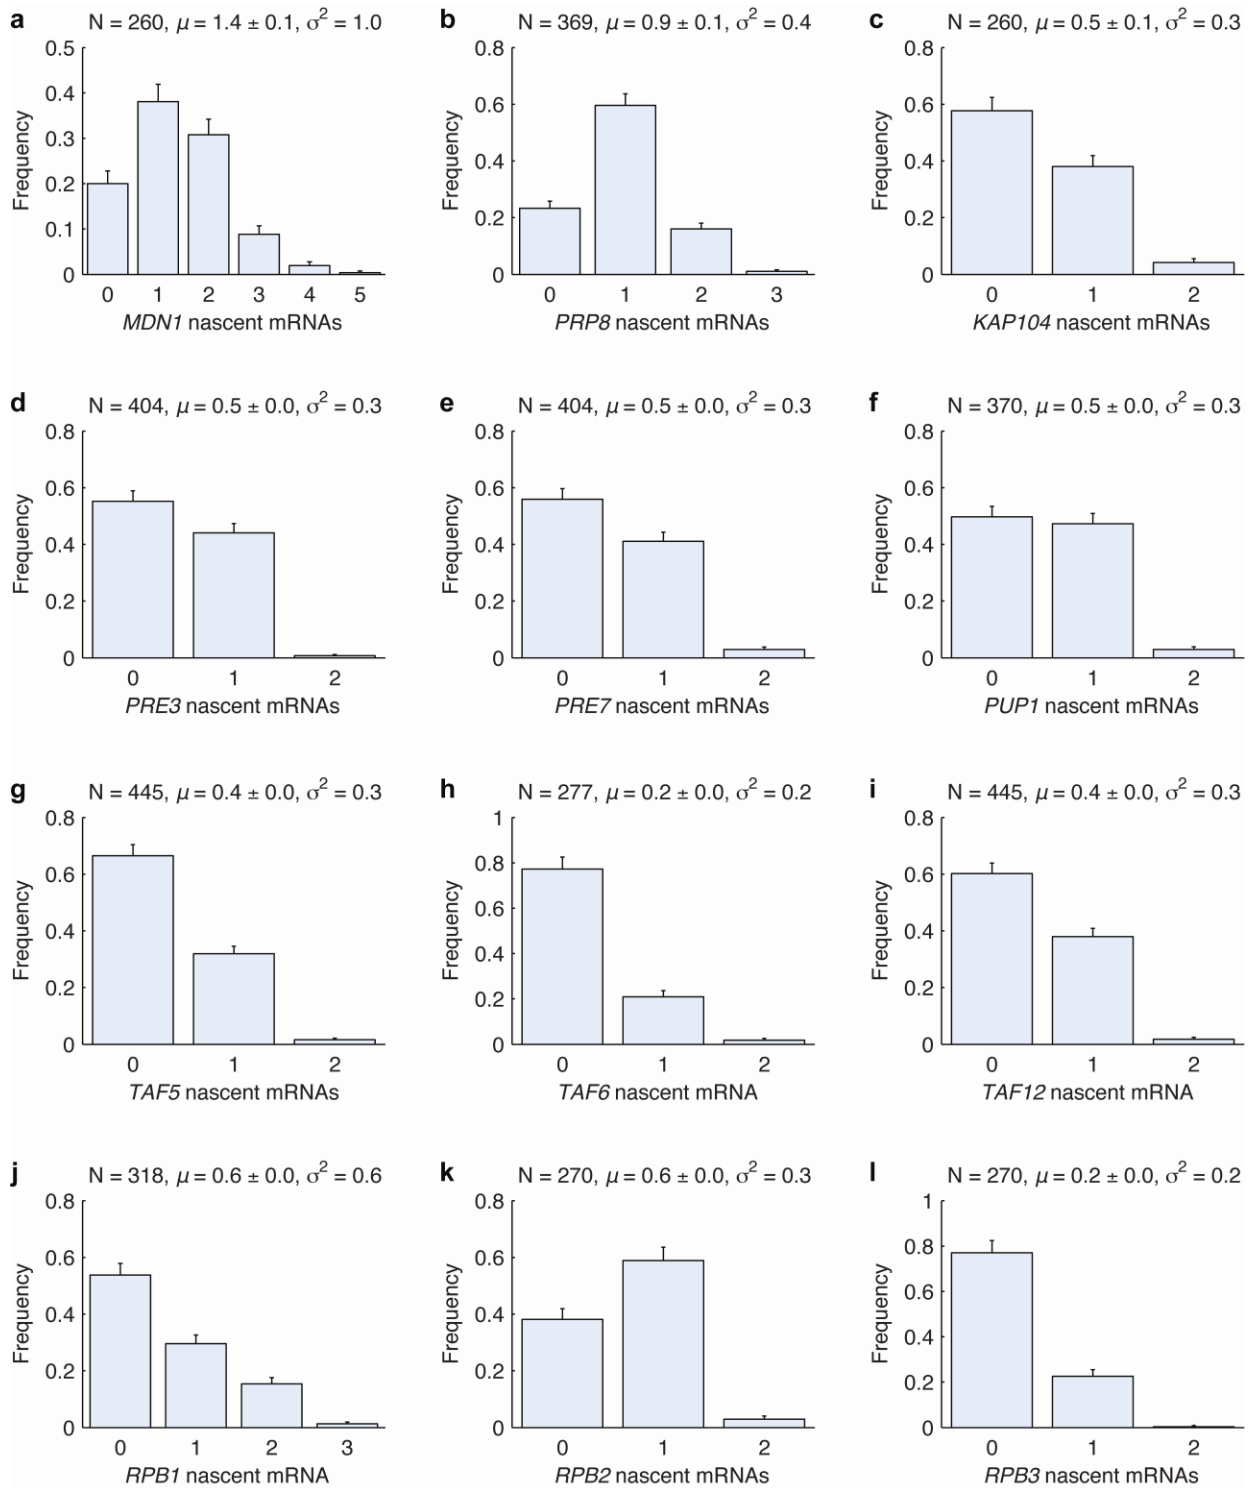

**Supplementary Figure 6, related to Figure 4 and Figure 5: Distribution of nascent mRNAs per cell at the transcription site in the nucleus.**

**Supplementary Figure 6, related to Figure 4 and Figure 5: Distribution of nascent mRNAs per cell at the transcription site in the nucleus.** (a-l) The number of nascent mRNAs for each gene were calculated by dividing the intensity of FISH signal at the transcription site in the nucleus by the intensity of individual mRNAs in the cytoplasm. ( $\mu$ ) and ( $\sigma^2$ ) represent the mean and variance, respectively, for a population of N cells. Error bars indicate s.e.m.



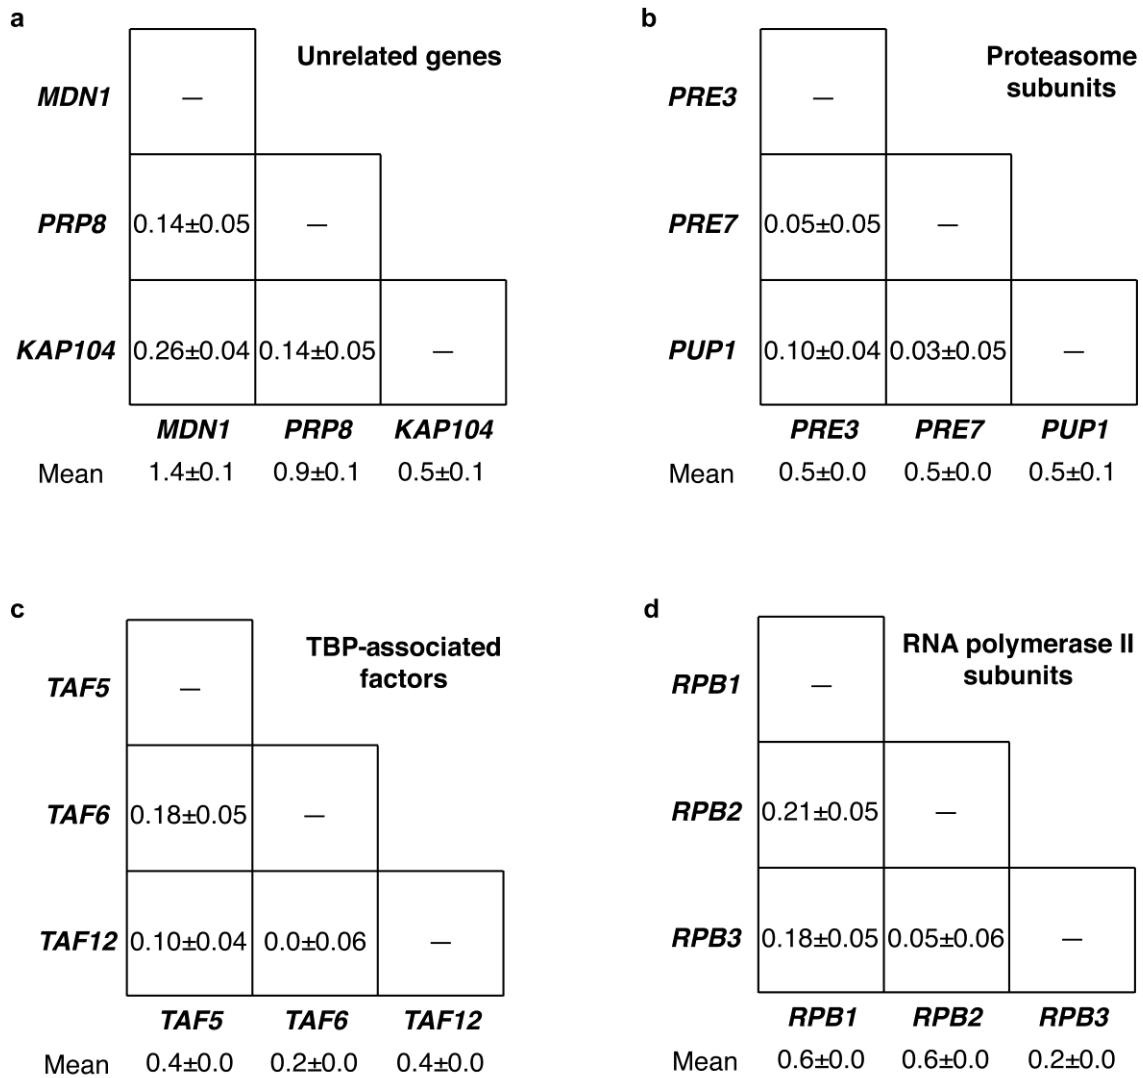

**Supplementary Figure 7, related to Figure 4 and Figure 5: Correlation between nascent mRNAs at the transcription site in the nucleus.** (a) Pair-wise correlation coefficients between the number of nascent mRNAs at the transcription site for three functionally unrelated genes. (b) Pair-wise correlation coefficients for nascent mRNAs of three genes encoding  $\beta$ -subunits of the proteasome 20S core particle. (c) Correlation coefficients for three genes encoding TATA binding protein associated factors involved in transcription initiation. (d) Correlation between three genes encoding subunits of RNA polymerase II. Error bars indicate s.e.m.

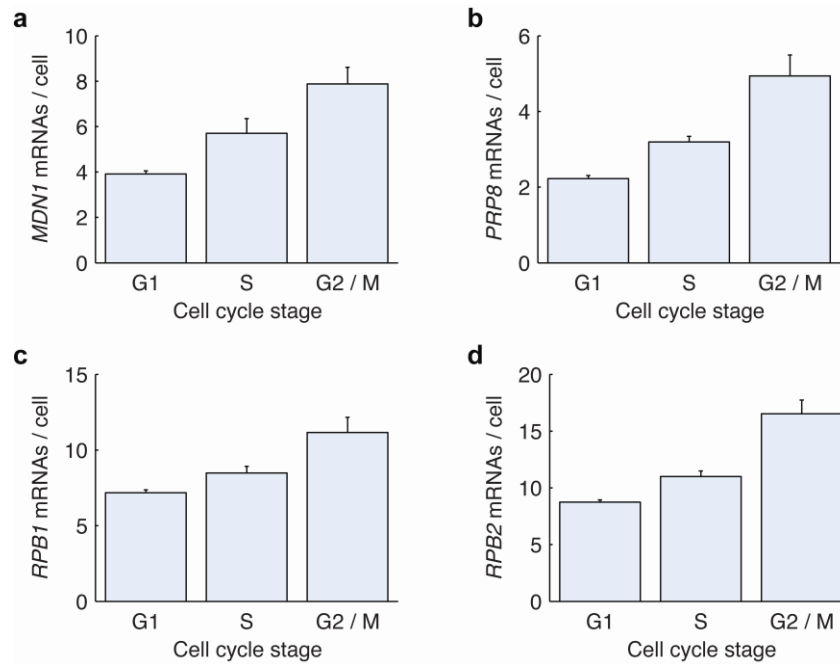

**Supplementary Figure 8, related to Figure 7c-f: Mean mRNA abundance of constitutive genes increases over the cell cycle. (a-d)** Experimentally measured average mRNA abundance across three different stages of the cell cycle. Differential interference contrast images were used to divide asynchronous cells into three different cell cycle stages based on morphology. Error bars indicate s.e.m.

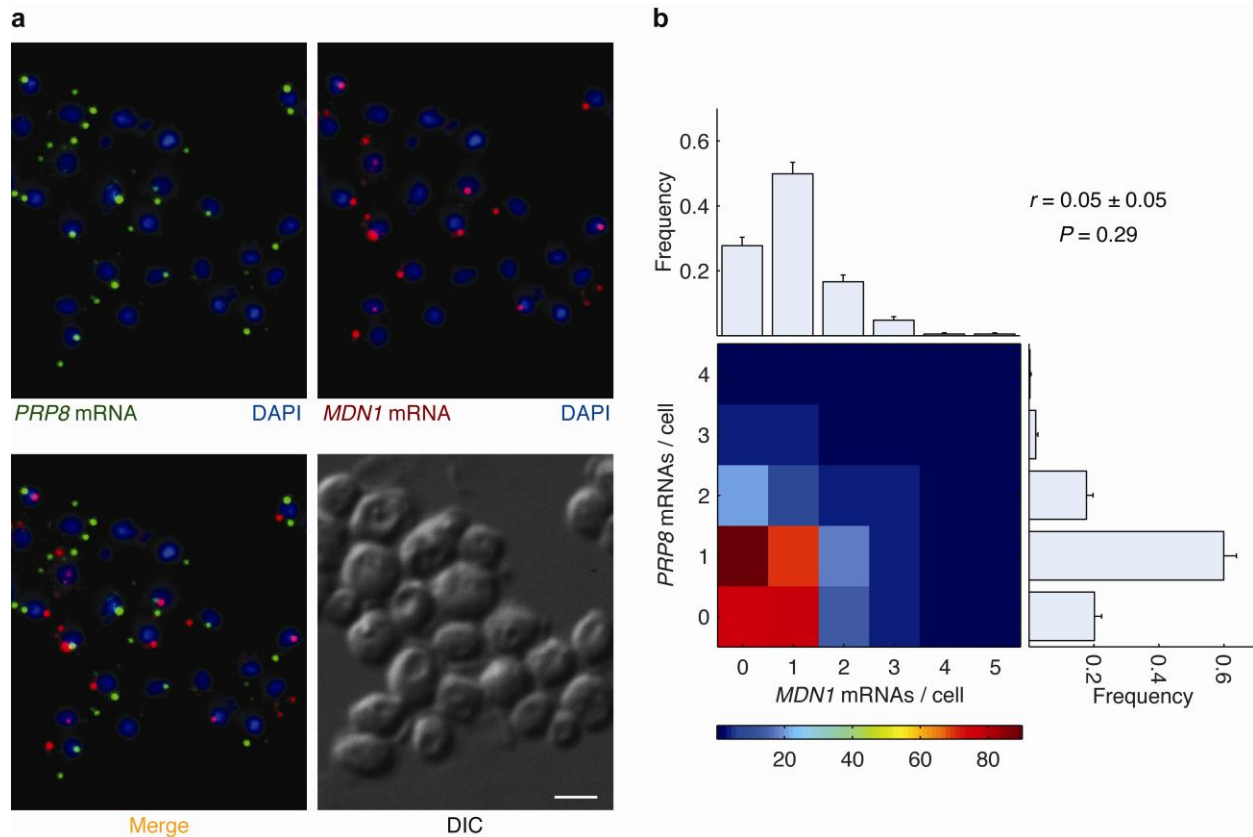

**Supplementary Figure 9, related to Figure 4 and Figure 7: Synchronizing effect of cell division disappears in cells with long cell cycles. (a)** Representative FISH images of *PRP8* (green) and *MDN1* (red) mRNAs in cells grown in glucose-limiting media to achieve a doubling time of 14 hours. The scale bar in DIC image is 2  $\mu\text{m}$ . **(b)** Heat map of number of *MDN1* and *PRP8* mRNAs in 397 cells shows that the correlation between these two genes is reduced to  $0.05 \pm 0.05$  from  $0.26 \pm 0.05$  in cells with a doubling time of 90 minutes. Marginal histograms:  $\mu_{MDN1} = 1.0 \pm 0.05$ ,  $\sigma_{MDN1} = 0.9$  (top);  $\mu_{PRP8} = 1.0 \pm 0.04$ ,  $\sigma_{PRP8} = 0.7$  (right). Error bars indicate s.e.m.

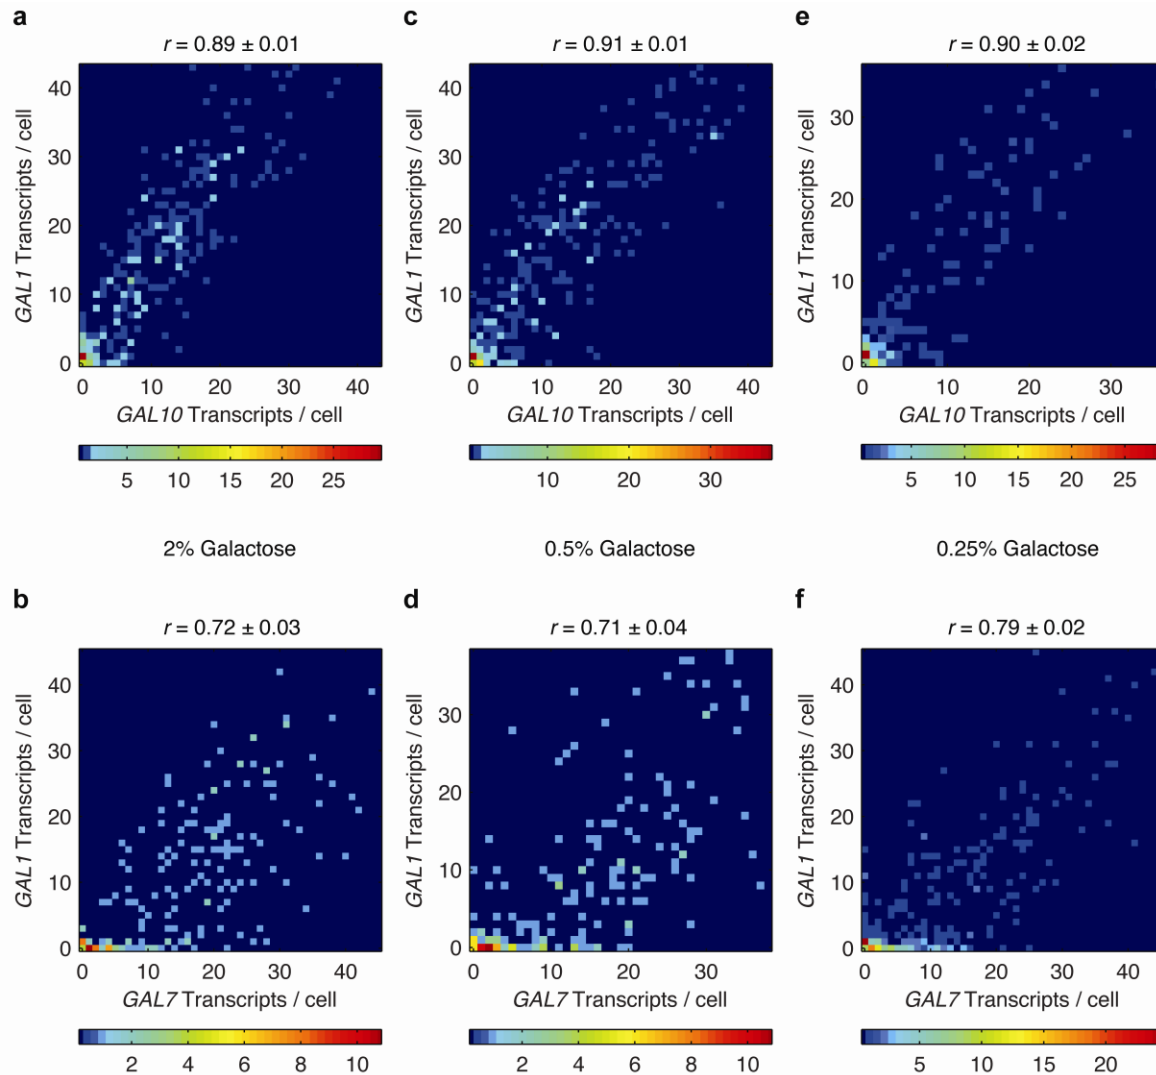

**Supplementary Figure 10, related to Figure 2: Coordination in the expression of GAL genes is independent of the galactose concentration used for induction.** All cells were induced for 15 minutes with varying concentrations of galactose, as indicated. Nascent or mature mRNAs were present in approximately 90% of cells upon induction with 2% galactose. About 75% of cells were induced with 0.5% galactose and 70% were induced with 0.25% galactose. **(a)** Heat map shows a high correlation coefficient ( $r$ ) between the number of *GAL10* and *GAL1* mRNAs in cells induced with 2% galactose. **(b)** Correlation between *GAL7* and *GAL1* mRNAs in cells induced with 2% galactose. **(c, d)** Pair-wise correlations between GAL genes in cells induced with 0.5% galactose. **(e, f)** Pair-wise correlations upon induction with 0.25% galactose. Error bars indicate s.e.m.

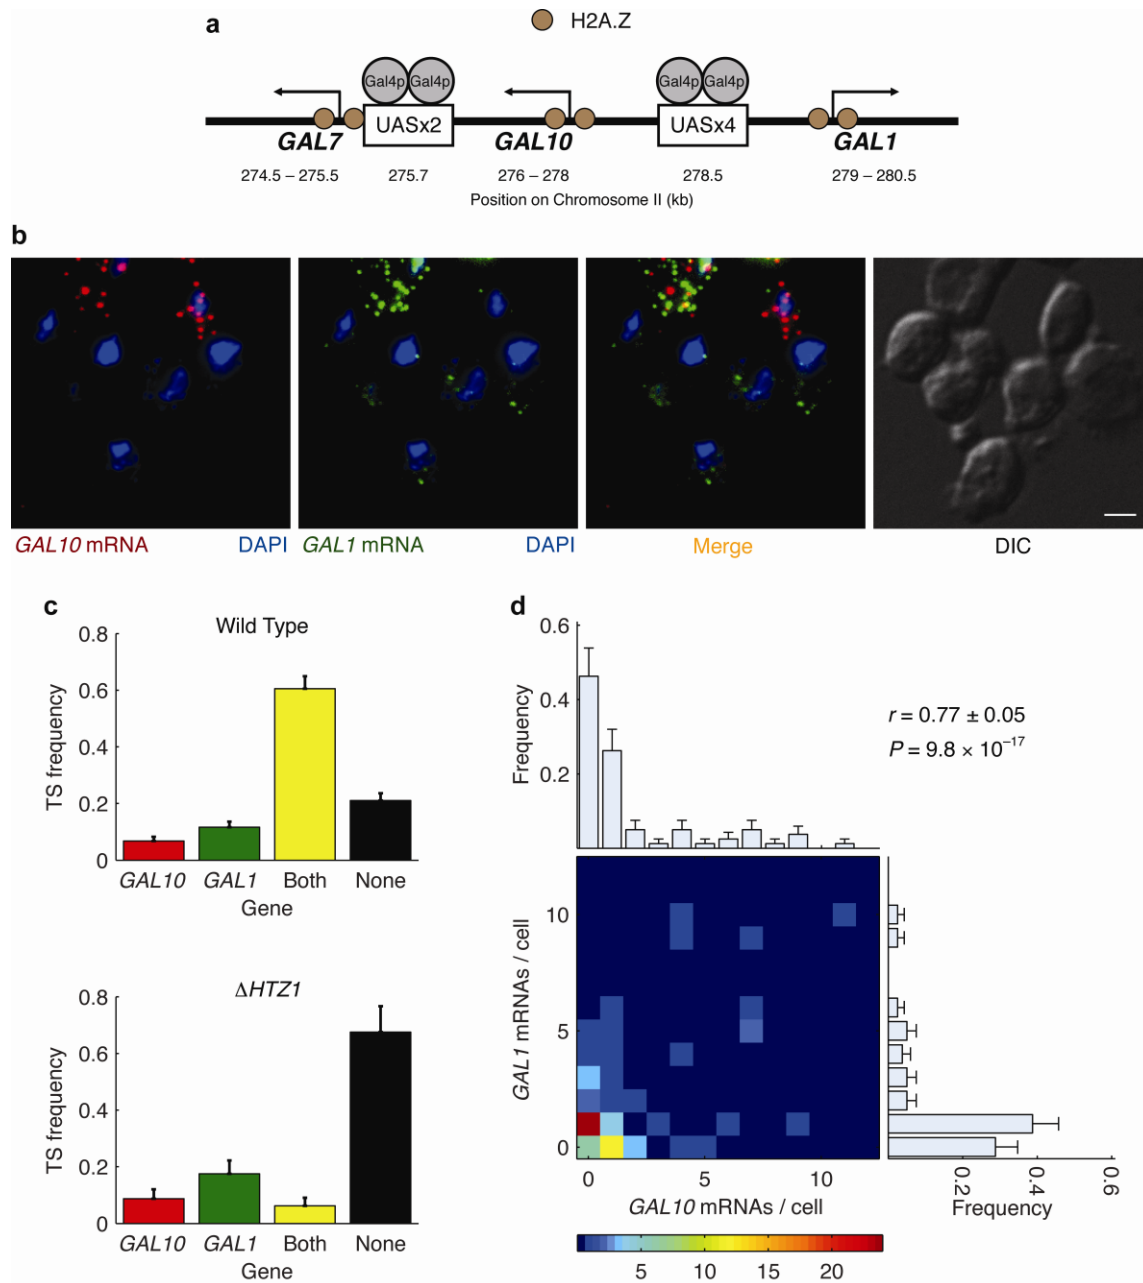

**Supplementary Figure 11, related to Figure 1 and Figure 2: Deletion of histone H2A variant H2A.Z reduces the correlation between *GAL1* and *GAL10*.**

**Supplementary Figure 11, related to Figure 1 and Figure 2: Deletion of histone H2A variant H2A.Z reduces the correlation between *GAL1* and *GAL10*.** (a) Incorporation of H2A.Z makes the +1 and -1 promoter nucleosomes slightly unstable and is thought to promote gene activation by exposing the transcription start site. (b) Deletion of *HTZ1*, the gene encoding H2A.Z, led to a significant decrease in the expression of GAL genes. Only 40% of cells were induced after 30 minutes of induction with 2% galactose. *GAL10* mRNA (red) and *GAL1* mRNA (green) is shown along with DAPI (blue) and DIC image of cells. The scale bar is 2  $\mu\text{m}$ . (c) Within the induced population, the percentage of cells actively transcribing both genes in the nucleus fell sharply compared to wild type cells (2% galactose, 15 minutes). (d) Heat map of number of *GAL10* and *GAL1* mRNAs per cell shows a reduced correlation between these two genes compared to wild type cells. The marginal histograms indicate that the mean mRNA abundance was also reduced significantly.  $\mu_{GAL10} = 2.0 \pm 0.4$ ,  $\sigma_{GAL10}^2 = 12.1$  (top);  $\mu_{GAL1} = 3.0 \pm 0.4$ ,  $\sigma_{GAL1}^2 = 30.5$  (right). Error bars indicate s.e.m.

| Gene          | Mean mRNA abundance <sup>1</sup><br>(molecules/cell) | mRNA Half-life <sup>4</sup><br>(min) | Mean protein <sup>19</sup><br>abundance<br>(molecules/cell) |
|---------------|------------------------------------------------------|--------------------------------------|-------------------------------------------------------------|
| <i>MDN1</i>   | 1.2                                                  | 26                                   | 538                                                         |
| <i>PRP8</i>   | 1.2                                                  | 38                                   | 468                                                         |
| <i>KAP104</i> | 0.8                                                  | 16                                   | 2130                                                        |
| <i>PRE3</i>   | 4.5                                                  | 16                                   | 7250                                                        |
| <i>PRE7</i>   | 4                                                    | 25                                   | —                                                           |
| <i>PUP1</i>   | 3.5                                                  | 32                                   | 11400                                                       |
| <i>TAF5</i>   | 1.3                                                  | 18                                   | 14800 ± 203                                                 |
| <i>TAF6</i>   | 0.9                                                  | 15                                   | 6510 ± 1290                                                 |
| <i>TAF12</i>  | 1.3                                                  | 22                                   | 930 ± 45                                                    |
| <i>RPB1</i>   | 2.9                                                  | 24                                   | —                                                           |
| <i>RPB2</i>   | 3.9                                                  | 26                                   | 18700                                                       |
| <i>RPB3</i>   | 3.3                                                  | 18                                   | 10000 ± 668                                                 |
| <i>GAL1</i>   | 0.2                                                  | —                                    | —                                                           |
| <i>GAL7</i>   | 0.1                                                  | 18                                   | —                                                           |
| <i>GAL10</i>  | —                                                    | —                                    | —                                                           |
| <i>NDD1</i>   | 0.4                                                  | 30                                   | 799                                                         |
| <i>SWI5</i>   | 0.8                                                  | 17                                   | 688                                                         |
| <i>CLB2</i>   | 1.1                                                  | 13                                   | 339                                                         |

**Supplementary Table 1: Previously published mRNA abundances, mRNA half-lives, and protein abundances for all genes considered in this study.**

## SUPPLEMENTARY METHODS

### Analytical solution for mRNA correlations

#### Model

The model presented here elaborates on previous work describing fluctuations of protein numbers in a dividing population of cells (Berg, 1978). In between two cell division events, mRNAs of a given gene are assumed to be transcribed randomly, independently of each other, at a rate of  $k_i$  messages per minute. Once an mRNA molecule has been generated, it decays with a uniform probability per unit time  $k_d$ :

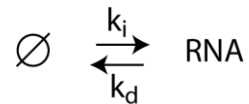

In between cell divisions, transcripts of each gene initiate and decay independently from the other gene. At cell division, the two mRNA populations get partitioned between daughter cells simultaneously, but independently.

In the following sections, we first extract the master equation that describes the time evolution of the number of mRNA of one gene between cell cycles. We then find the solution to this master equation, imposing as a boundary condition that the cells are in a steady state growth, i.e. the number of mRNAs in the cell is the same at each generation. From the master equation, we determine the time-dependent probability distribution for the number of mRNAs of that gene. We show that the probability distribution of the number of mRNAs follow a Poisson distribution at all times. The mean of that Poisson distribution varies over the cell cycle and is equal to the deterministic solution of the continuous differential equation system corresponding to our model.

We use the single gene mRNA probability distribution to compute the predicted values of the observables of the experiments. First, we compute the time-averaged probability distribution of the mRNA number for one gene. This is the formal equivalent of looking at unsynchronized cells that were fixed at a given time: each cell is at a different stage of the cell cycle. Therefore, the time-averaged distributions should reflect the experimentally observed distributions. We can then use the time averaged mRNA probability distribution to compute the mean number of transcripts presents in the cell. Finally, we can compute the correlation between two genes. For the sake of simplicity, we assume here that the two genes have equal appearance and decay rates.



## Master equation

The probability that an mRNA molecule is transcribed during an infinitesimal time interval  $dt$  is equal to  $k_i dt$ . During the same time interval, an existing mRNA molecule will decay with a probability  $k_d dt$ . If there are  $m$  mRNA molecules in the cell, the probability that one decay event occurs during the interval  $dt$  is, therefore, equal to  $mk_d dt$ . Using these expressions, we can write the master equation that sets the time evolution of the probability  $P(m, t)$  to have  $m$  transcripts in the cell at time  $t$ :

$$P(m, t + dt) = P(m, t) + k_d dt [(m + 1)P(m + 1, t) - mP(m, t)] \\ + k_i dt [P(m - 1, t) - P(m, t)] \quad (1)$$

We introduce the generating function  $G(z, t)$  as a mathematical tool to solve the master equation (1):

$$G(z, t) \stackrel{\text{def}}{=} \sum_{m=0}^{\infty} z^m P(m, t) \quad (2)$$

We first determine the expression of  $G(z, t)$ . We can then compute the mRNA probability distributions  $P(m, t)$  using the following property of the generating function:

$$P(m, t) = \frac{1}{m!} \lim_{z \rightarrow 0} \frac{\partial^m G}{\partial z^m} \quad (3)$$

We multiply each side of (1) by  $z^m$  and sum over  $m$  to obtain:

$$\partial_t G = k_d(1 - z)\partial_z G + k_i(z - 1)G \quad (4)$$

We perform the following variable change:

$$v = k_i(1 - z) \\ w = k_i(1 - z)e^{-k_d t}$$

The master equation then appears as a simpler form:

$$\partial_v G = -\frac{G}{k_d} \quad (5)$$

We integrate the differential equation as follows:

$$G = A(w)e^{-v/k_d} \quad (6)$$

where  $A$  is some function of the variable  $w$ . Therefore  $G$  has the form:

$$G(z, t) = A\{k_i(1 - z)e^{-k_d t}\} \exp\left[-\frac{k_i}{k_d}(1 - z)\right] \quad (7)$$

The function  $A$  is unknown at this point, but we can determine its expression by imposing conditions corresponding to steady state growth.

## Boundary conditions

We impose a steady state growth condition, meaning that the number of mRNAs in the cell is independent of the generation it belongs to. We also assume that mRNAs are equally partitioned between daughter cells at cell division.

Let's assume a cell has  $j$  mRNAs right before cell division. Then the probability to get  $m$  mRNAs in one of the daughter cells is given by the binomial partitioning probability:

$$\left(\frac{1}{2}\right)^j \binom{j}{m} \quad (8)$$

Therefore, the probability of having  $m$  mRNAs in the cell at the beginning of the cell cycle can be expressed in terms of 1) the probabilities of having  $j$  mRNAs in the cell at the end of the cell cycle and 2) binomial partitioning (8):

$$P(m, t = 0) = \sum_{j=m}^{\infty} P(j, t = T_g) \left(\frac{1}{2}\right)^j \binom{j}{m} \quad (9)$$

We introduce again the generating function  $G(z, t) \stackrel{\text{def}}{=} \sum_{m=0}^{\infty} z^m P(m, t)$ . The boundary condition can then be written in terms of  $G$ :

$$G(z, t = 0) = G\left(\frac{1+z}{2}, t = T_g\right) \quad (10)$$

Combining equations (7) and (10), we obtain the following condition on the unknown function  $A$ :

$$\forall x, \quad A(x) = A\left(\frac{x}{2} e^{-k_d T_g}\right) \exp\left(\frac{x}{2k_d}\right) \quad (11)$$

The condition in (11) is satisfied by the following function:

$$A(x) = \exp\left(\frac{1}{2k_d} \frac{1}{1 - \frac{1}{2} \exp(-k_d T_g)} x\right) \quad (12)$$

We write the expression of  $A$  from (12) into (7) and obtain the full expression of  $G(z, t)$ :

$$G(z, t) = \exp\left[-\frac{k_i}{k_d} (1-z) \left(1 - \frac{\frac{1}{2} \exp(-k_d t)}{1 - \frac{1}{2} \exp(-k_d T_g)}\right)\right] \quad (13)$$

### Time-dependent probability distribution

Using the property of the generating function (3), we calculate the probability distribution of the mRNA number  $P(m, t)$  from the expression of generating function  $G(z, t)$  in (13):

$$P(m, t) = \frac{1}{m!} \exp \left[ -\frac{k_i}{k_d} \left( 1 - \frac{\frac{1}{2} \exp(-k_d t)}{1 - \frac{1}{2} \exp(-k_d T_g)} \right) \right] \left( \frac{k_i}{k_d} \left( 1 - \frac{\frac{1}{2} \exp(-k_d t)}{1 - \frac{1}{2} \exp(-k_d T_g)} \right) \right)^m \quad (14)$$

We recognize here the expression of a Poisson distribution

$$P(m, t) = \frac{\lambda(t)^m e^{-\lambda(t)}}{m!} \quad (15)$$

where the mean  $\lambda(t)$  is dependent on time:

$$\lambda(t) = \frac{k_i}{k_d} \left( 1 - \frac{\frac{1}{2} \exp(-k_d t)}{1 - \frac{1}{2} \exp(-k_d T_g)} \right) \quad (16)$$

As expected, the time-dependent mean is equal to the deterministic solution of the continuous differential equation system based on our model. The stochastic calculation shows that the mRNAs remain Poisson distributed around this varying mean during the entire cell cycle, even right after cell division.

The expression of  $\lambda(t)$  is the product of  $k_i/k_d$  by a correction factor.  $k_i/k_d$  is the ratio of the generation rate divided by the decay rate of the mRNA molecules, which would be the equilibrium value of the mean number of transcripts in the absence of cell cycle. The absence of a cell cycle is formally equivalent to the limiting case where the cell cycle duration is much longer than the other time scales involved, i.e.  $k_d T_g \rightarrow \infty$ . In this limit, the correction factor is equal to 1 when  $t$  reaches infinity. Therefore the mean number of mRNA when the system reaches equilibrium is equal to the expected value:  $(t \rightarrow \infty) = k_i/k_d$ . In the same limiting case ( $k_d T_g \rightarrow \infty$ ), we find that the mean number of mRNA at the beginning of the cell cycle is as expected half the number of mRNAs reached as equilibrium:  $(t = 0) = k_i/2k_d$ .

### Time averaged probability distribution

We first compute the probability distribution of the number of mRNA molecules in the cell averaged over the cell cycle  $\langle P(m, t) \rangle_t$ :

$$\langle P(m, t) \rangle_t \stackrel{\text{def}}{=} \frac{1}{T_g} \int_{t=0}^{T_g} P(m, t) dt \quad (17)$$

$$\langle P(m, t) \rangle_t = \frac{1}{T_g} \int_{t=0}^{T_g} \frac{\lambda(t)^m e^{-\lambda(t)}}{m!} dt \quad (18)$$

$$= \frac{1}{T_g} \int_{t=0}^{T_g} \frac{1}{m!} \left( \frac{k_i}{k_d} \left( 1 - \frac{\frac{1}{2} \exp(-k_d t)}{1 - \frac{1}{2} \exp(-k_d T_g)} \right) \right)^m \exp \left( -\frac{k_i}{k_d} \left( 1 - \frac{\frac{1}{2} \exp(-k_d t)}{1 - \frac{1}{2} \exp(-k_d T_g)} \right) \right) dt \quad (19)$$

The development of this expression is not very informative and yields integrals that cannot be solved analytically. However, this integral can be readily estimated numerically. This is the case for all of the following statistical quantities.

### Mean number of transcripts

We can use the expression of the time averaged probability distribution (18) to compute the average number of transcripts  $\mu$  present in the cell over the cell cycle. It is an important number: it is the value we have access to in the experiments, as we average together cells from various stages of the cell cycle. By definition,

$$\mu = \sum_{m=0}^{\infty} m \langle P(m, t) \rangle_t dt \quad (20)$$

We insert the explicit expression of  $\langle P(m, t) \rangle_t$  obtained in (15):

$$\mu = \sum_{m=0}^{\infty} \frac{m}{T_g} \int_{t=0}^{T_g} \frac{\lambda(t)^m e^{-\lambda(t)}}{m!} dt \quad (21)$$

### Variance of the number of transcripts

The variance is defined as follows:

$$\sigma^2 = \frac{1}{T_g} \int_{t=0}^{T_g} \sum_{m=0}^{\infty} m^2 P(m, t) dt - \left( \frac{1}{T_g} \int_{t=0}^{T_g} \sum_{m=0}^{\infty} m P(m, t) dt \right)^2 \quad (22)$$

Hence,

$$\sigma^2 = \sum_{m=0}^{\infty} \frac{m^2}{T_g} \int_{t=0}^{T_g} \frac{\lambda(t)^m e^{-\lambda(t)}}{m!} dt - \left( \sum_{m=0}^{\infty} \frac{m}{T_g} \int_{t=0}^{T_g} \frac{\lambda(t)^m e^{-\lambda(t)}}{m!} dt \right)^2 \quad (23)$$

### Joint probability distribution of the number of transcripts

We consider here two genes within the same cell, with mRNAs that are produced and degraded independently. We compute the probability  $Q(m, n, t)$  to observe the  $m$  transcripts of gene 1 and  $n$  transcripts of gene 2 at time  $t$ . For simplicity, we assume that the mRNAs expressed by the two genes have the same kinetics (equal values of  $k_i$  and  $k_d$ ).

Since the transcripts are independent,  $Q(m, n, t) = P(m, t)P(n, t)$ . The correlation in the mRNA abundance of the two genes comes only from the fact that they undergo cell division in synchrony.

Using the expression of  $P(m, t)$  in (18), we can express  $Q(m, n, t)$  as follows:

$$Q(m, n, t) = \frac{\lambda(t)^{m+n} e^{-2\lambda(t)}}{m! n!} \quad (24)$$

Hence,

$$\langle Q(m, n, t) \rangle_t = \frac{1}{T_g} \int_{t=0}^{T_g} \frac{\lambda(t)^{m+n} e^{-2\lambda(t)}}{m! n!} dt \quad (25)$$

### Covariance of transcripts numbers expressed by two genes

The covariance of the number of mRNAs measures how the numbers of transcripts from two different genes change together within the same cell. It is a useful intermediate in the calculation of the correlation coefficient.

By definition, the covariance is equal to:

$$Cov \stackrel{\text{def}}{=} \sum_{m,n=0}^{\infty} \frac{1}{T_g} \int_{t=0}^{T_g} m n Q(m, n, t) dt - \langle n \rangle^2 \quad (26)$$

$$Cov \stackrel{\text{def}}{=} \sum_{m,n=0}^{\infty} \frac{mn}{T_g} \int_{t=0}^{T_g} \frac{\lambda(t)^{m+n} e^{-2\lambda(t)}}{m! n!} dt - \left( \sum_{m=0}^{\infty} \frac{m}{T_g} \int_{t=0}^{T_g} \frac{\lambda(t)^m e^{-\lambda(t)}}{m!} dt \right)^2 \quad (27)$$

### Correlation Coefficient

In the case of two identical genes, the correlation coefficient  $r$  is equal to the ratio of the covariance (27) divided by the variance (23):

$$r = \frac{Cov}{\sigma^2} \quad (28)$$

The value of  $r$  can be determined by numerical approximations of the sums in the numerator and the denominator.

### Numerical estimates

In order to compute the numerical values of  $r$  for a range of parameters, we wrote a program in Matlab 7.0.1 (TheMathworks). The inputs were the generation time (set invariably to  $T_g = 90$  minutes), the mean number of transcripts  $\mu$  and the experimental half life  $t_{1/2}$ . From the values of these macroscopic observables we first computed the microscopic rates as follows:

$$k_d = \frac{\log(2)}{t_{1/2}} - \frac{\log(2)}{T_g}$$

$$k_i = \frac{\mu k_d}{1 - \frac{1}{k_d T_g} \left( 1 - \frac{1}{2 - \exp(-k_d T_g)} \right)}$$

Note that the formula linking the molecular  $k_d$  to the half life includes a correction term corresponding to mRNA dilution during cell division. Formulas (23) and (27) were then estimated the following way: integrals were evaluated using the adaptive Gauss-Kronrod quadrature algorithm, and the discrete sums over the number of transcripts were truncated at a value arbitrarily set to the largest value between 20 and  $5k_i/k_d$ .

## FISH Probe Sequences

Ts indicate amino-allyl modified bases.

*CLB2* 182 TGC GGC TGT TGA TCT TGA TAC GCT TTC TCT AGT AAA TTG AGG AAT CCG AC  
*CLB2* 321 GCA GCT CAG CTC TCC CCT CCT TTA TAG AAG TTA GCG CAC CAA ATT GCT GA  
*CLB2* 427 TCT ACC GAG TTA TGG ACT ACC TCA GTG CTT GAT CCA ACG CCT TTT AGG GG  
*CLB2* 984 CCC CTT CTT TGA TTT CAT CTT CCG TAC ATG CAC CGT CTG TCT CTG ATG CG  
*CLB2* 1242 ACC CGC CGC TAT AGT GTA TTA GAT TTC CAT CCC ATT TAC CTT TAC CTA AC

*GAL1* – 1 TAT GCT CGG GCA CTT TTC GGC CAA TGG TCT TGG TAA TTC CTT TGC GCT AG  
*GAL1* – 2 ACC AGT CCG ACA CAG AAG GAT CAA TTG TGA CAT AAG AAC CGT CCA ACG GC  
*GAL1* – 3 GAA GAC AAT CCA CTG CCA GTT GGT ACA TCA CCC TCA CAG AAG ACT TGC AG  
*GAL1* – 4 TAG CAT CTT TGT TAA CCG TTC GAT GCC GGA TTC AAT ATC GCC GTT CCA GG  
*GAL1* – 5 TCG TGC TCG ATC CTT CTT TTC CAG AAA GTA AAA CAA CAC CGT ACG TGG CAG C  
*GAL1* – 6 TGT GCG ACA TCG TCA ACA CTA AAG CCC TGT TTC TTA TTG GCG AGA GAC TC

*GAL7* 80 TGT AAG CAG CCT CCT GTT GAC CTA ACC AAG GTC TTT TAG CTC TGT GTG GAG  
*GAL7* 244 CCT CAT TGG AAT CAT TCT GTG GTA AAA TAG GTT GAT CGA GCC TAA CGG CAG C  
*GAL7* 428 AGG CTT ATG ATT TTC TCT TGC TTC TCT GGA GAG ATC GTC AGT CAA TGC TTG CC  
*GAL7* 541 CTT GCG AAA CTT CAC TAG GGA TGG ATT CTA AGC ACC AAG CTT GGC CAT GTG G  
*GAL7* 765 GGC GAG GTC CTC CTT CAC CAT TTG GTT AAA TTG GCT AAT TGA GGC AAG CTT C  
*GAL7* 878 ACT CAA TTC ATC ACC AGT CGC ATT CAA AGG AGC CTG ATG GAT ACC CAT TG

*GAL10* 152 CTC ATA GAA GGG AAT GTG ATG CTT GGT CAA GAC CTC TAA CCT GGC TAC AG  
*GAL10* 778 CGA CAC AAA CCT TCA TTT TCA TTG TAG GCC TCT AGG TAT TGC AGG GCT GC  
*GAL10* 925 GCC CTA TCT GGT TTA GCC GTC AAG TTC AAA ACA TCA CCT GCT CTT CTG CC  
*GAL10* 1059 GCA TAT CTT CAG CGG AAA ATC TGG CCT CGA CAC CCC TTA ACT GGT AAC CA  
*GAL10* 1173 CAA GAA CAA CTG ATT GTC CGT TCA CTT TCA GGT CAA CAA TGC TGG CGC CC  
*GAL10* 1448 ACC TGG AAA TTC GGT GTC CTT CTC ATT ATC TAT CAG CAT GTA CTC GGC GG

*KAP104* 99 CTA GTT GCA ACA CAT AGT CTT CGG CGG GCT TCC ATG TCG ATG CCA TCT TT  
*KAP104* 425 ATA CCG GCG GTA GCT CTA TTG TTC TGA AGA TCC TGT AGG GAG TAG TGT TG  
*KAP104* 1421 CCT GCC TCT TTC TTT TTC ACA ATA CGG GGT GCA ATG GGC TTG ATG TCC TC  
*KAP104* 2870 AGT CCT TCT CAG GCA CTA CTA TTG TCG GGT CTT GAT GTG ATT TGG CTT CC

*MDN1* 794 TTT GTC GTG GAT AGT GTG GAC CTT AGG GAC GAT AAC GCC ACA GAT TGA CG  
*MDN1* 860 CTC CCG AGT TGA CGA AGA GAG GAA ACC GTT TTA TGA GTA GGG ACA AAG GTT  
*MDN1* 1104 CTA TAA GTA CCC ATC TCC CTT CTT TGA CCG CGG TAG CGA GAA CAC CAG CTC  
*MDN1* 1210 TTT GCA GCC TTT ACA GTC TCT CCT CTG GAT GGA ATG GTT AGT TCG CGC TT  
*MDN1* 4350 CAC CTT TCT GCA AGA AGC ATA TAG CCA CTG GCA GCA AGC TGC TCA TAT CC  
*MDN1* 4511 CTA AGA CGG ATA GTC GGC GCA TTC CTT TTG TCC AAG TAA CAG AGC CAA TG

*NDD1* 45      GTA TCT GCA TTA TTG TCC GTA GAG GGC TGT CTT GAG GAA GTT GCA GTT GCC  
*NDD1* 325      CCT TGT GAC AGC AGG AGG TAC AAG TGA ACC TAG AGC TTG CTG TTG TTG TTG  
*NDD1* 430      TGC TCT GGG GAT GCA ACC AAA AAT TCG CTG GGT AAA GAG TTG CCG AAC TG  
*NDD1* 536      TGC TGA GCA CCG TTA GAA TCT GTT ACA AAT CGA AGT GGT GTC TTT GCC GGA G  
*NDD1* 994      TCG TTG TCC TTA GTT AGT GTG CTA GTG CTA TTG ATG GTA TCC TGG GGG GT  
*NDD1* 1251     CTT GGG TAG CTC AGG AAT TTG TAA GGC AGA TGT ACC TGT GGT TGT ACT ATG C

*PRE3* 39      CAC CAT CCT TAA ATG TCA CGG CCA TAA TTG AGG TAC CTA AAC TGA CTT CGC CC  
*PRE3* 104      ATC TGT CAC ACG GTT AGC TAT GTA CGC ACC AGT GGT GGT ACG TGA ATC AG  
*PRE3* 164      TGC GTG TCT GCT GCA GAA CCG GAC CTA CAA CAC CAA ATT TTG TCA TGT ACT C  
*PRE3* 270      CGT AAC ATA ATT CTT TGA ACA CCG AGG CAG CAG TCT CTG TGG AGG GGG TA  
*PRE3* 556      TCC ACA CCA GCA GCT GTC AAA ACA ACC ATT CTT ATA ACA CCA CCG GAA GAT CC

*PRE7* 3      GTT CAA TGG GTG TAT TTG ACG CCT CCG AAG AGT ATT CTG ATG CAA TAG TGG CC  
*PRE7* 193      TCG CCG TCT GCT GCA AAT CCA TTC GCC GAC ATG ACT ATG TTA TCA CCA CA  
*PRE7* 385      TCG AAC GAA TAG ACA GCG CCC TTA CCA TCT TCG TCA AGA CCC GCA ATG AT  
*PRE7* 582      GTA GCA GAA GTG AAC GAG TCT CTC ACC AGT TTG ATG ACT TCT TCC ACG GAC

*PRP8* 520      GTG GTG GTG GTG GAA GTG CTA AGT CGC TGT CCT CTT CAA AAC CAG GAG GTg  
*PRP8* 572      ATG GCA CCA TCG GAT TAT CCA GTT CTT CGA TTT CGT ATC CAG GCG GTG GT  
*PRP8* 655      gaa GTC CAC AAT TTC TTC AGC GTT TAT TTC GAA GTT GCT TGG AGG AGG TGG TG  
*PRP8* 904      ttG GAG GCC ATG TCA CTG TGA GTA TTA ATA ATC TTT CGC AGA TGT TCC GGT G  
*PRP8* 2617     GAG TAG TGG TAT AGT GCC TCT TAA GAA ATT TAG CCA CAC TCT CCA CGC Agg Tt  
*PRP8* 2879     TTT TGA TTG GGG CTG GCA TAC CAG GAA CAT CCC ATG GAA TAT TAG CCT TC  
*PRP8* 2968     GTG AGC TCC ACG CTT TAT ACG TTC TCG ATT GTA ATG AGC TGC AGA TAC CC  
*PRP8* 3108     ccA TAA CAG AAA ATA TGG TCG TAG CCT CTT CGG GAG TAA TTT CGG GAC CGT Tt

*PUP1* 51      CTA CAA TGG TGG TAC CCG TGG AAG TTG CCT TAG GTT GTG TGT GCG AGT TT  
*PUP1* 385      TGC GCA TGA ATG GAG AAC AAA TGA GAT CCC GTA GGG TCT ACA CCT GCA AC  
*PUP1* 489      TGG CTT CCT CCT TCG TAA GGT CTT GCT TCC AGT GTG ATT CCA ACA CAG CCA TT  
*PUP1* 683      CTC CTT CAG CAC AGC AGT TGT ACC CCT GGG GAA TTT GTA GCT TTT CTG CT

*RPB1* 3      TGG ACC TCT TTT ACT GTA CGG AGT GGA GCA CTA GAA TAC TGT TGT CCT ACC  
*RPB1* 122      CCT AGG GTC GTT TAG ACC ACC AAT TTT CGC TCT CGT CTG GGT TTC ATC CA  
*RPB1* 449      ACC TCC CCT TGA TAC GAG CTG AGT AGG ATC ATC TTC AGA AGG GAC ATC TG  
*RPB1* 569      TTC CTC CGT ACT TAA AAC TCT TAG TTC TGG TTC ATC CGC ATC CCC CGT GG  
*RPB1* 730      TCC TCA CCT CTT TGA GAT TCA TTG AAG GAA ATG GAT GGA CGC ACC GGT GG  
*RPB1* 1195     AAA TCT ATA CGG TCT CCG CTA TCA CGA ATG ACG TAT TTG GCA CCG GGG TG

*RPB2* 758      AAT AGT ACG AGC TGA ACT ACC CTC ACG ACC ATA AAG CTT GAC TTG AAG GG  
*RPB2* 976      TAC CAA GGG CAG TAC CAC GAC GAC CAA TAA AGT CTA ATG CAG TTT CAC GAT C  
*RPB2* 1353     GTT CAC CCC AGT TAC CAG TAG CCA AAG CGT ACT TAA GAC CCG ATG TTA TGG TTT  
*RPB2* 1734     TTG CTG GGT TTC TGT GAA CAC CGT GCC AAA CAC CAT TGA CGA AGA CCC TT  
*RPB2* 2134     CGT TTG GCA GGA TCA ACA TCG AGA TCG TTT TCC TCA TTT GCC TCT GCA GG



*RPB2 2274* TAC CCA TCG CAG ATT GGT AAG TGT TAC GCG GAG ATT GAT TAT GGT CAG GG  
*RPB3 87* TGG CTA AAG TGG GAA TCT CTG CTA TCA TGA CTC TAC GGA GAG AAT TGG CC  
*RPB3 273* CGC TTT CGC CGA ACG CTT GCA ATG TTA ACA CCA CTG AAC ACT TAT CAC AG  
*RPB3 458* CTT GGC GTG CTC TTT GGC TAT ACC CTT TTT CGC AAC GCA TGT CAG TTT CA  
*RPB3 510* TGA GCT TAT TCC AAG GAT CAT ACT CGA ACT CTA TGG CTG CTG CTG GAC CC  
*RPB3 873* TAC CCA TTT GAG ATG CAT TGG AGT AAG GAT CTT GCT CAG CGC CCG TCA TC  
  
*SWI5 – 1* tAG CAG AGT TGG ACG TAG CTG AAC TAA CTC TAC TCT TTG GAG TGA AGG GCG  
*SWI5 – 2* tAG GAC CTG GTT TTC CAA GAA GTT CAA TAC CCA GGC CCA AAG GTT TCT CTG  
*SWI5 – 3* TTA GGG TCT AAA TCA TTG AAA ACG CCT TCC CGA TGT CGT GCT TGC TGG CTa  
*SWI5 – 4* TGG CGA AAC CAT AAT CCC CGT TCC ATT CCC ATC ATA ACT ACG CTC TCT TC  
*SWI5 – 5* ACT GTG GAC CAT CAG AGT TCT CTA AGG TAG CCT GTA GTT GTT GTT GCT TG  
*SWI5 – 6* ACT CGG AGA AAG TAG AAA CCT TGA CAG ATT TTT CAT CAG AAA GTG GTC CCA GCG G  
*SWI5 – 7* GAA GGG TCA CTG CCT CTA GCA TTT GAG TAA TAA GAG TTG GTT TGT AGG TCA A  
  
*TAF5 196* GCT CTC AGC ATG GCC TCT GTA CGG TGG TAT CCC TTT TTA TTC AGG TAC TC  
*TAF5 381* CTA GTC GCC CGC TAG ATA CTA TAC CAC CTT CTG CAT CTC TCT TGG ATG AC  
*TAF5 1633* ACT AGC GCG GTG TGA GTA TCC ATG GAC CAT AGC CTG ACG GTT TTA TCT TC  
*TAF5 1854* TTC GAC ACG TCT TAT CGC TGG ATC CCG TAA ACA CAT AGC AAC CGT TCG GA  
*TAF5 2029* CCA TGG CCA CGC ATT TGT TTC AAC CTT TTG CCG GTA CCA ATA TCC CAT AC  
*TAF5 2176* AAG TAT CCA ATG AAT GGC TCA TCT GGT TCT GCG CTT GGC TCA GTA GTG GC  
  
*TAF6 294* CTT CTT CCT CAT CCA GGT AGT AAA CCG ACT GTC CTC CAC TTG TGT TAA CC  
*TAF6 369* TGC TAG CCA ATG TGT AGT AAA AGT TGG TAG ACG AGG CAC TTG CGG TAA TGG C  
*TAF6 525* TCA CAG AAG CAC TTG CTG TCG TCG ACG TTA CAG GTG TTT GGA GGC TGT TA  
*TAF6 747* TGG AAC CAG TTG GTG CAG GCC ACT ATC AGT TCG TAG TGA AGT CAA AGC TGC T  
  
*TAF12 62* ACT GTC TCG GTT GCA GTA CCA TAT TTT GCT GAG CTC CTG TGA TCG CAT CAG  
*TAF12 220* CTT GCG CAG CCT GTT GTC TTC TCC TAT TCA GTG TAA GGG CAT CAT ATA CCT G  
*TAF12 547* GCA GTT CAA TTT TCT TTT CTT GTA GCT GCT GCT TGG GCC CTT CGT CCG TCT G  
*TAF12 744* GCT GCT GCT GCT GCT GTT GTT GTT GTT GTT GTA CCC TTT GTT GCT GC  
*TAF12 800* TCT TTG GTT TTG ACC CTG GCG TTG CTG TTG CTG TTG CTG TTG CTG TTG CT
